# Supplementary material for: Deleterious Mutation Accumulation in Arabidopsis thaliana Pollen Genes: A Role for a Recent Relaxation of Selection
Source: PubMed Central journal article supplement (PMC6640295; doi:10.1093/gbe/evz127), 2019-06-18
Supplement: supplementary_matrial_evz127.pdf [file supplementary_matrial_evz127.pdf]

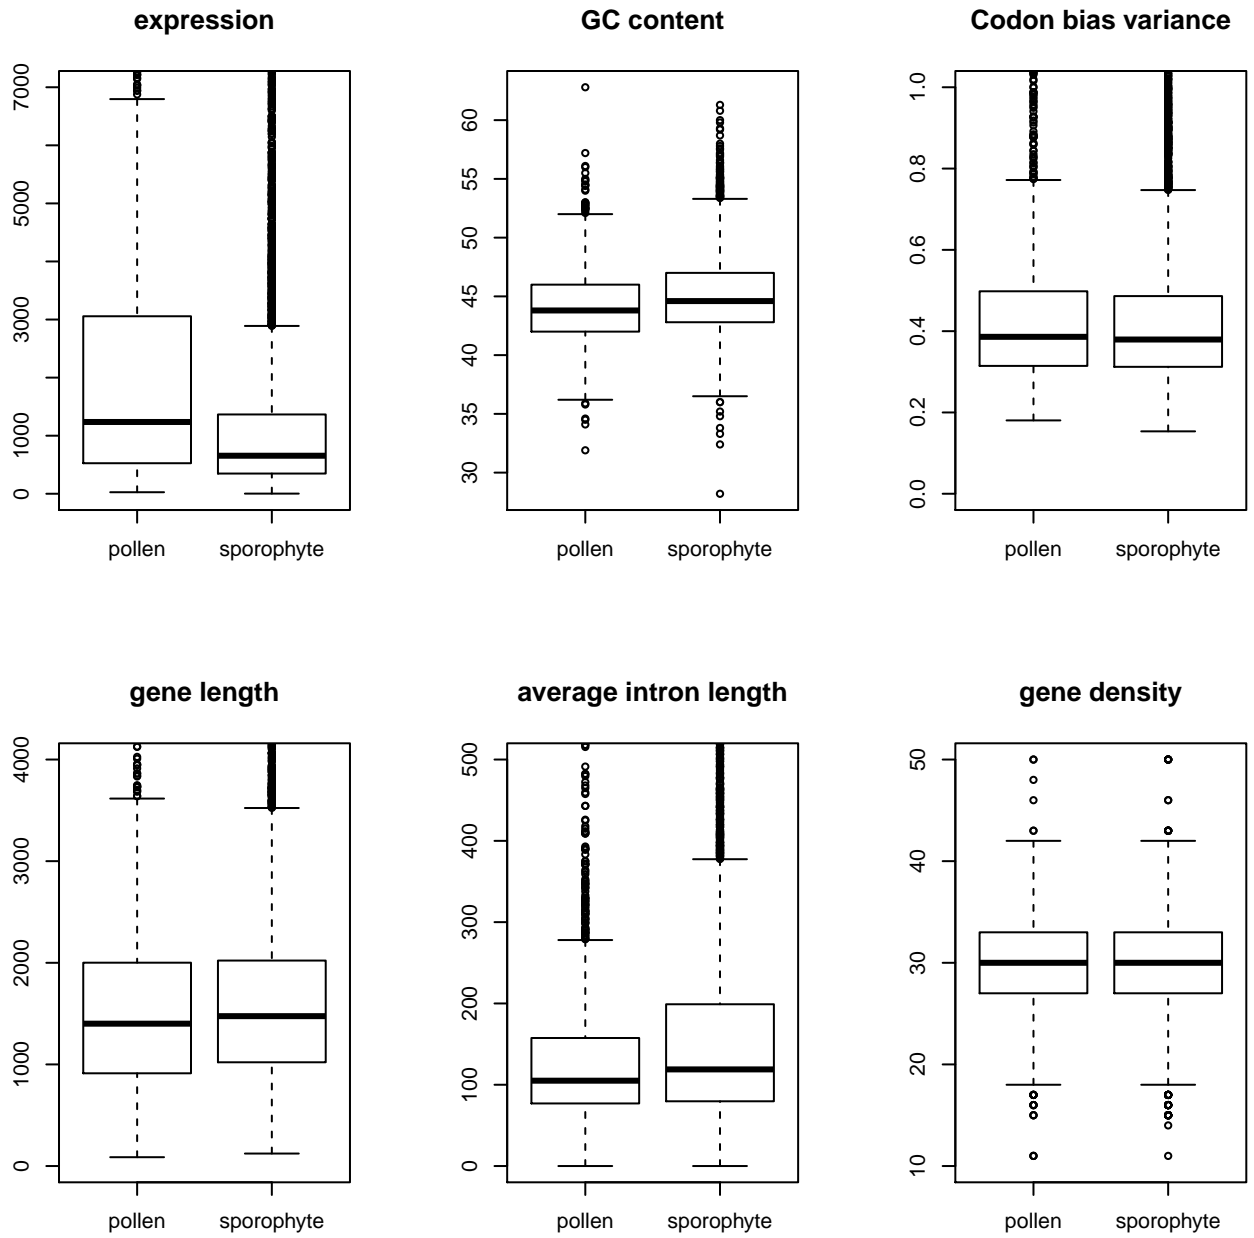

Figure S1: Genomic features of pollen- and sporophyte specific genes.

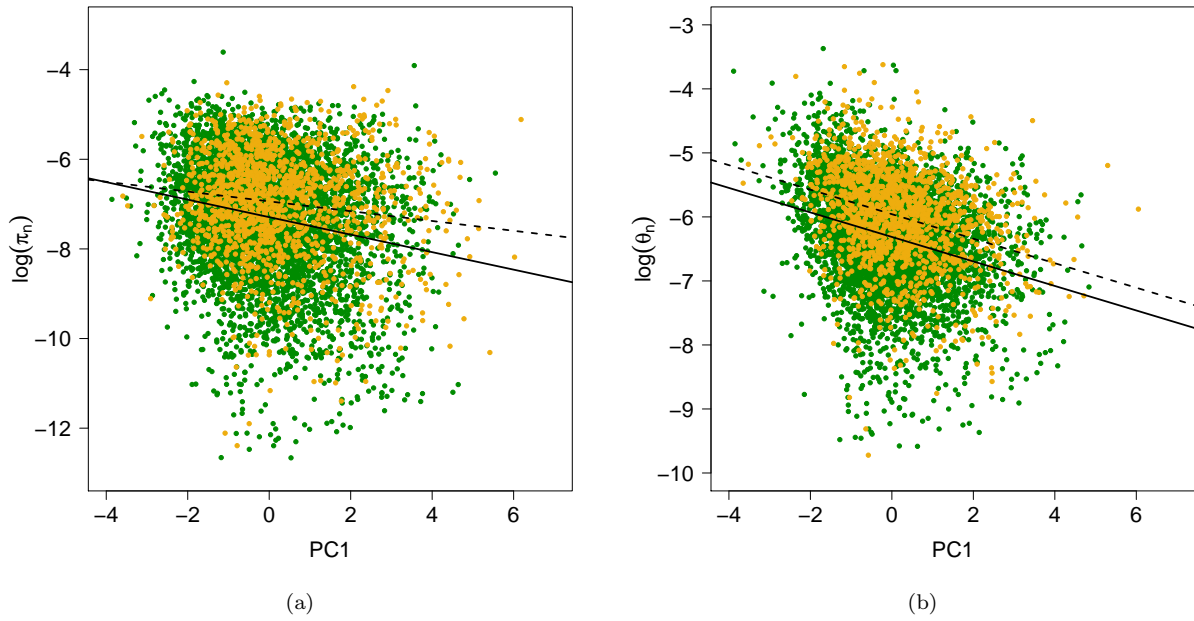

Figure S2: ANCOVA analysis with PC1 (6 genomic variables) as continuous variable reveals both higher  $\pi_n$  (a) and higher  $\theta_n$  (b) among pollen-specific (dark grey points and dashed line) than sporophyte-specific genes (light grey points and solid line).

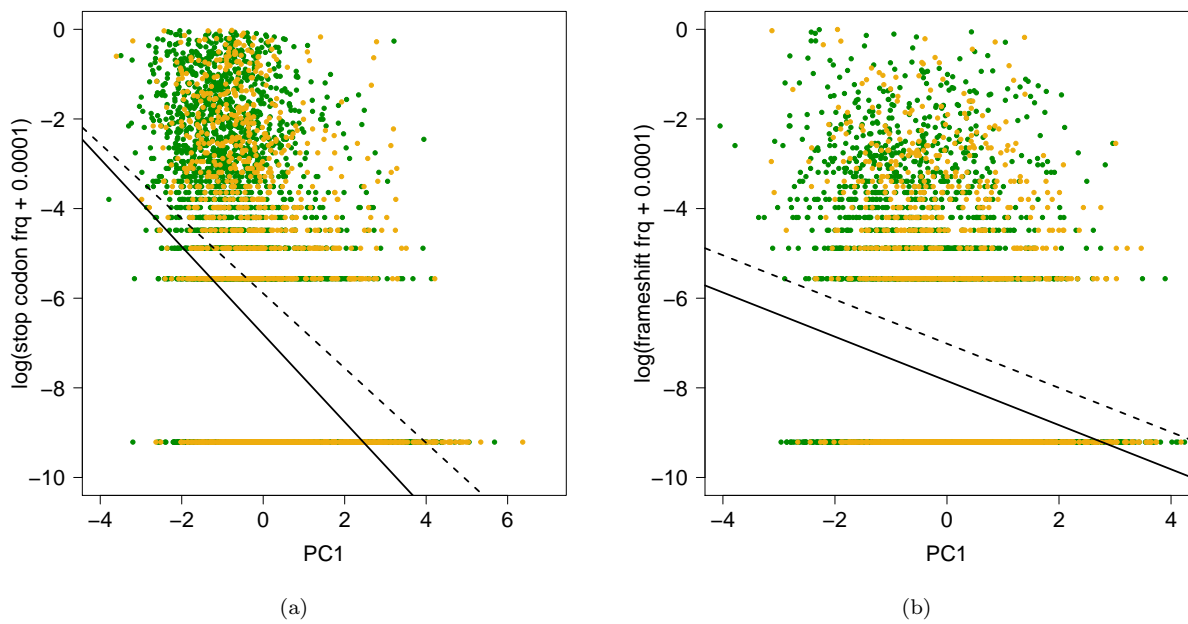

Figure S3: ANCOVA analysis with PC1 (6 genomic variables) as continuous variable reveals significantly higher frequency of stop codon mutations (a) and frameshift mutations (b) among pollen-specific (dark grey points and dashed line) than sporophyte-specific genes (light grey points and solid line).

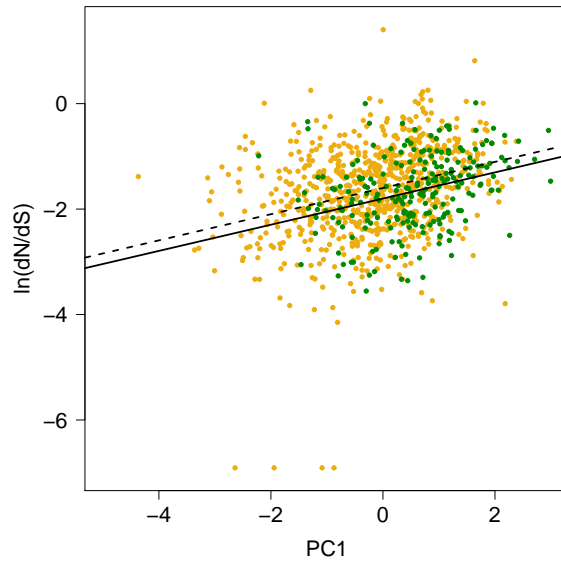

Figure S4: ANCOVA analysis of dN/dS within pollen-specific (yellow points and dashed line) and tissue specific, sporophyte genes (green points and solid line) with PC1 (expression and GC content) as the continuous variable .

587 figure 10

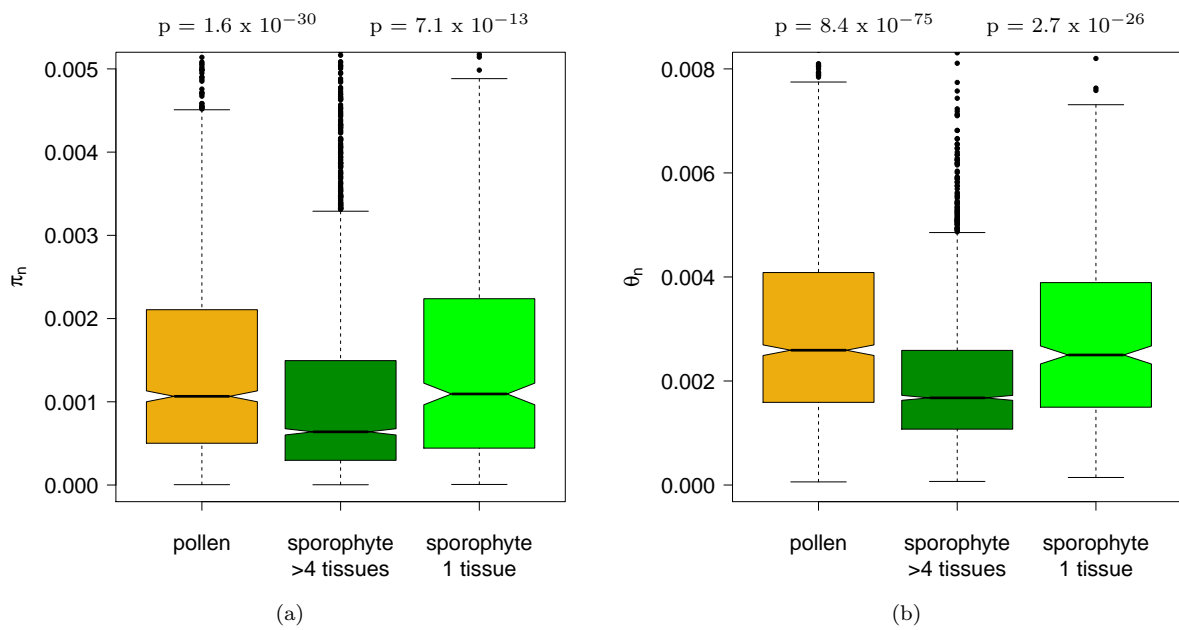

Figure S5: Non-synonymous nucleotide diversity (a) and non-synonymous Watterson's theta (b) within pollen-specific genes, broadly expressed sporophyte-specific genes and genes specific to guard cells, xylem or root hair.

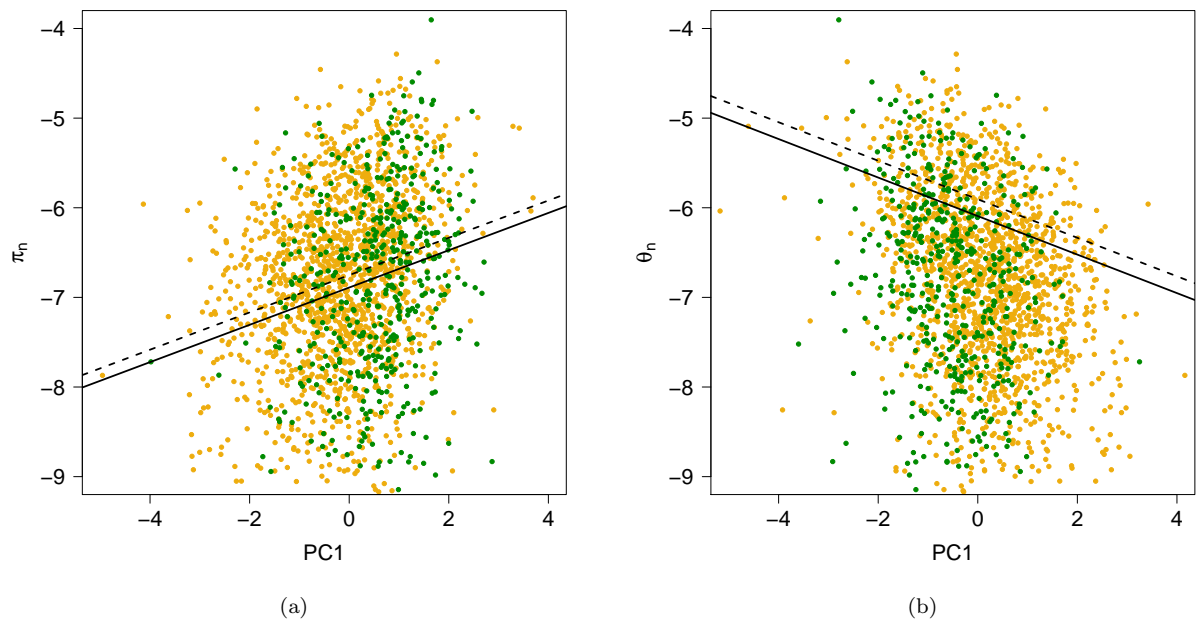

Figure S6: ANCOVAS comparing  $\pi_n$  (a) and  $\theta_n$  (b) within pollen-limited genes (yellow points and dashed line) to tissue-specific, sporophytic genes (green points and solid line) while controlling for the first PC of a PCR.

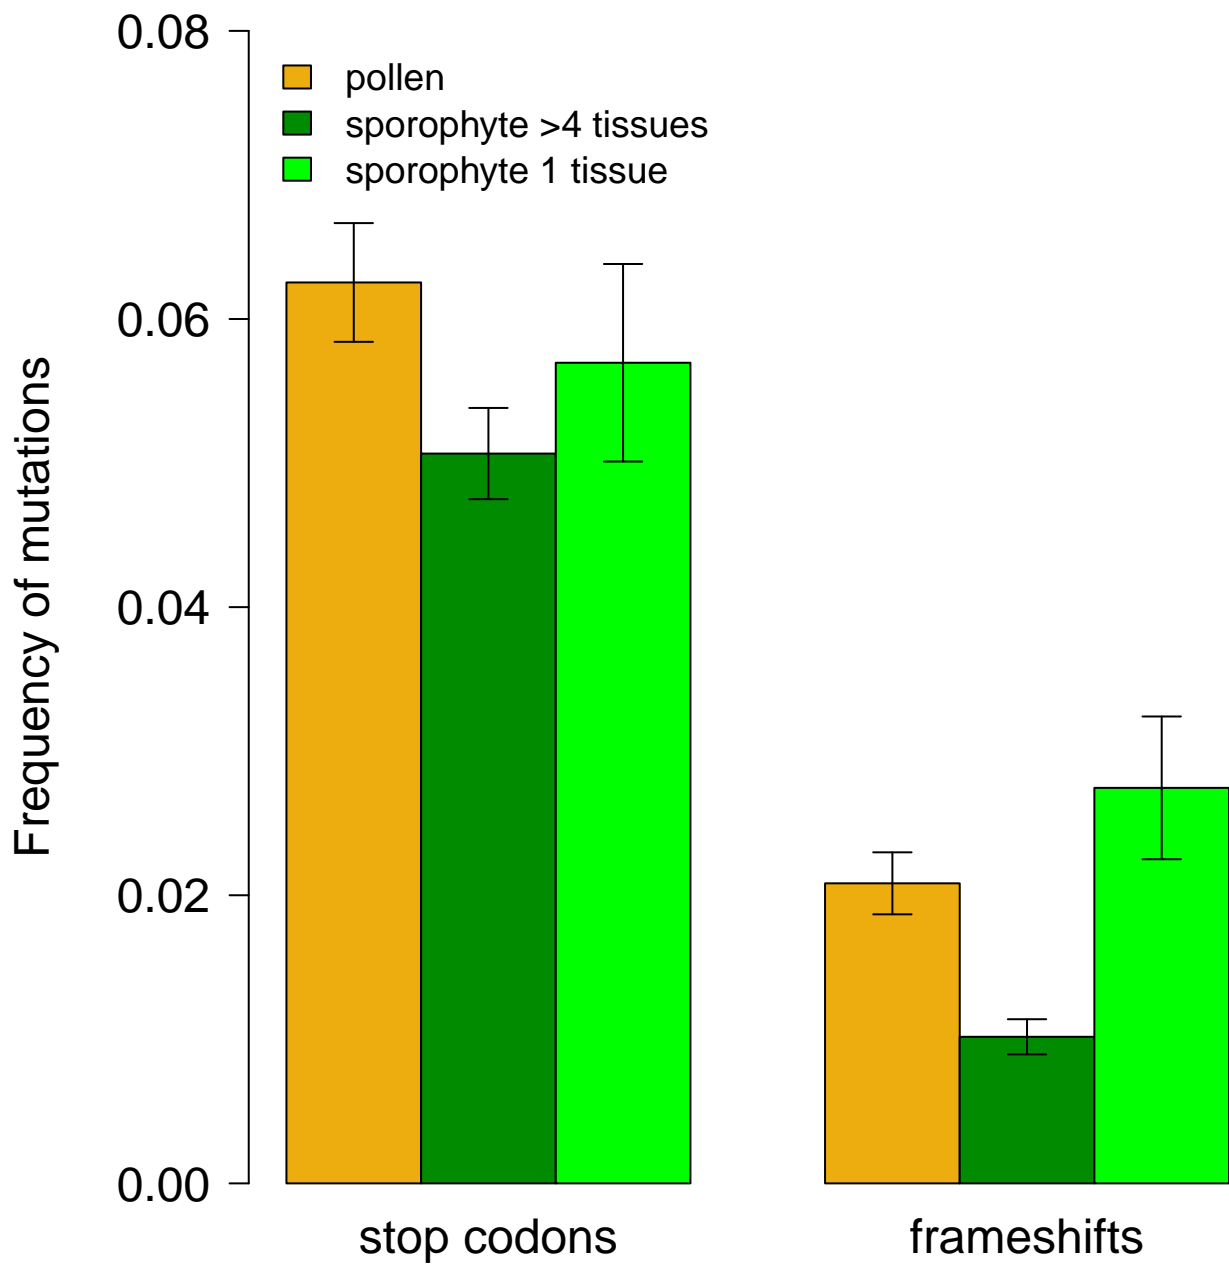

Figure S7: Frequency of stop codon and frameshift mutations within pollen-specific genes, broadly expressed sporophytic genes (at least 5 tissues) and tissue specific genes (expression restricted to guard cell, xylem or root hair tissues). **Shown are means and standard error.**

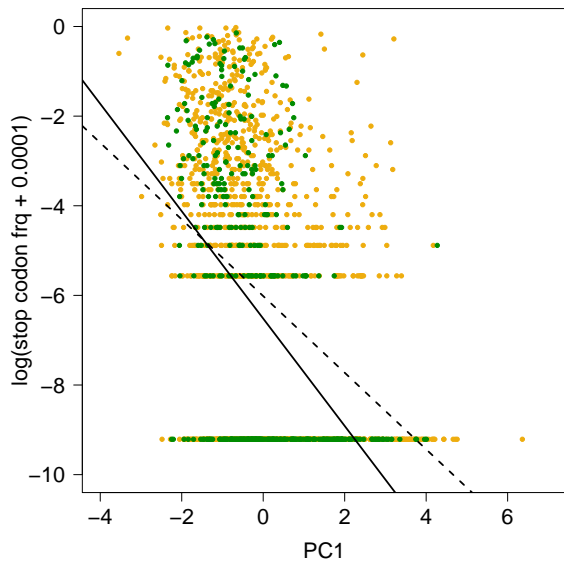

(a)

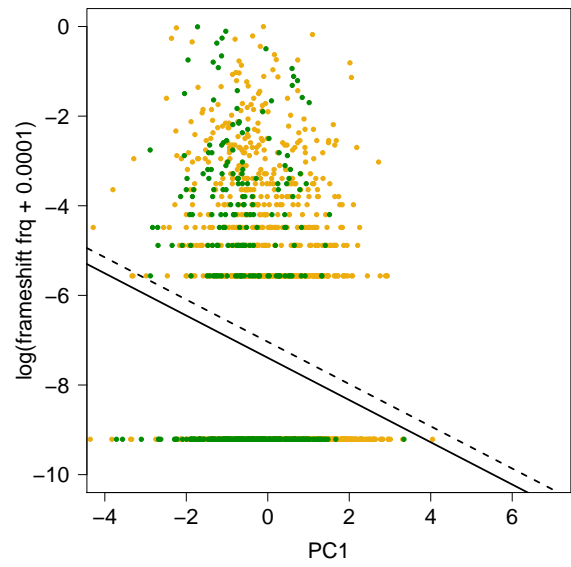

(b)

Figure S8: ANCOVAS comparing the frequency of stop codon mutations (a) and frameshift mutations (b) within pollen-limited genes (yellow points and dashed line) to tissue-specific, sporophytic genes (green points and solid line) while controlling for the first PC of a PCR.

Table S1: Expression data sets.

|         | Dataset | Description               | Chips | Original source                      |
|---------|---------|---------------------------|-------|--------------------------------------|
| Haploid | UNM     | Uninucleate microspore    | 2     | Honys & Twell, 2004                  |
|         | BCP     | Bicellular pollen         | 2     | Honys & Twell, 2004                  |
|         | TCP     | Tricellular Pollen        | 2     | Honys & Twell, 2004                  |
|         | MPG     | Mature Pollen             | 2     | Honys & Twell, 2004                  |
|         | GP*     | Pollen Tube Grouped       | 6     | Qin et al., 2009 ; Wang et al., 2008 |
|         | PT4*    | Pollen Tube Grouped       | 6     | Qin et al., 2009 ; Wang et al., 2008 |
|         | SPC     | Sperm Cell                | 3     | Borges et al., 2008                  |
| Diploid | SL      | Silique                   | 30    | NASC                                 |
|         | LF      | Leaves                    | 36    | NASC                                 |
|         | GC      | Guard Cell                | 3     | NASC                                 |
|         | PT**    | Petiole                   | 3     | NASC                                 |
|         | ST      | Stems                     | 2     | NASC                                 |
|         | HP      | Hypocotyl                 | 8     | NASC                                 |
|         | XL      | Xylem                     | 3     | NASC                                 |
|         | CR      | Cork                      | 3     | NASC                                 |
|         | RT      | Roots                     | 11    | NASC                                 |
|         | RH      | Root hair elongation zone | 3     | NASC                                 |

NASC: Nottingham Arabidopsis Stock Centre.

\* GP and PT4 were combined to one data set called PT, selecting the highest expression level of the two for each gene.

\*\* Renamed PET

Table S2: Comparison of chromosomal positions of pollen and sporophyte genes. Mann Whitney U test.

| Chromosome | W                  | p     |
|------------|--------------------|-------|
| 1          | $2.79 \times 10^5$ | 0.137 |
| 2          | $1.00 \times 10^5$ | 0.071 |
| 3          | $1.72 \times 10^5$ | 0.315 |
| 4          | $8.54 \times 10^4$ | 0.267 |
| 5          | $2.31 \times 10^5$ | 0.241 |

Table S3: dN/dS between *A. thaliana*, *A. lyrata* and *C. rubella*. Values are means (and medians); **p-values denote significance of difference in dN/dS between pollen and sporophyte genes on each branch**; significance was tested with Mann Whitney U test; p-values are Bonferroni corrected for multiple testing.

|                                          | Pollen          | Sporophyte      | p value               |
|------------------------------------------|-----------------|-----------------|-----------------------|
| <i>A. thaliana</i> vs. <i>A. lyrata</i>  | 0.2689 (0.2106) | 0.1963 (0.1664) | $4.3 \times 10^{-24}$ |
| <i>A. thaliana</i> vs. <i>C. rubella</i> | 0.2409 (0.2036) | 0.1801 (0.1567) | $8.8 \times 10^{-22}$ |
| <i>A. lyrata</i> vs. <i>C. rubella</i>   | 0.2370 (0.1945) | 0.1818 (0.1568) | $1.3 \times 10^{-15}$ |

Table S4: Nonsynonymous pi within 5 equal bins along the PC1 axis. Shown are medians (means).

|            | < 20%                |                          | 20% - 40%            |                          | 40% - 60%            |                          | 60% - 80%            |                          | > 80%                |                          |
|------------|----------------------|--------------------------|----------------------|--------------------------|----------------------|--------------------------|----------------------|--------------------------|----------------------|--------------------------|
| Pollen     | $1.0 \times 10^{-3}$ | ( $1.7 \times 10^{-3}$ ) | $1.1 \times 10^{-3}$ | ( $1.7 \times 10^{-3}$ ) | $1.1 \times 10^{-3}$ | ( $1.7 \times 10^{-3}$ ) | $1.1 \times 10^{-3}$ | ( $1.6 \times 10^{-3}$ ) | $8.4 \times 10^{-4}$ | ( $1.5 \times 10^{-3}$ ) |
| Sporophyte | $1.0 \times 10^{-3}$ | ( $1.7 \times 10^{-3}$ ) | $8.6 \times 10^{-4}$ | ( $1.4 \times 10^{-3}$ ) | $7.2 \times 10^{-4}$ | ( $1.2 \times 10^{-3}$ ) | $6.7 \times 10^{-4}$ | ( $1.1 \times 10^{-3}$ ) | $6.0 \times 10^{-4}$ | ( $1.0 \times 10^{-3}$ ) |
| p          | ns                   |                          | $1.1 \times 10^{-3}$ |                          | $1.1 \times 10^{-8}$ |                          | $5.8 \times 10^{-6}$ |                          | $1.0 \times 10^{-5}$ |                          |

Table S5: Frequency of stop codons within 5 equal bins along the PC1 axis. Shown are medians (means).

|            | < 20%           |         | 20% - 40%            |         | 40% - 60%            |         | 60% - 80%            |         | > 80%                 |         |
|------------|-----------------|---------|----------------------|---------|----------------------|---------|----------------------|---------|-----------------------|---------|
| Pollen     | 0.028           | (0.113) | 0.011                | (0.111) | 0.004                | (0.056) | 0                    | (0.033) | 0                     | (0.015) |
| Sporophyte | 0.015           | (0.106) | 0.004                | (0.063) | 0                    | (0.045) | 0                    | (0.022) | 0                     | (0.006) |
| p          | non significant |         | $5.7 \times 10^{-6}$ |         | $1.1 \times 10^{-5}$ |         | $6.3 \times 10^{-8}$ |         | $8.3 \times 10^{-11}$ |         |

Table S6: Differences in 6 genomic variables between pollen-specific genes and genes limited to one of three sporophytic tissues. Values are means  $\pm$  standard error of the mean; significance was tested with Mann Whitney U test; p-values are Bonferroni corrected for multiple testing.

|                          | Pollen-specific genes |             |   |          | guard cell, xylem or root hair |  |  | p                     |
|--------------------------|-----------------------|-------------|---|----------|--------------------------------|--|--|-----------------------|
| Expression level         | 2,562.30              | $\pm$ 86.49 | > | 446.24   | $\pm$ 26.82                    |  |  | $1.0 \times 10^{-77}$ |
| GC content (%)           | 44.20                 | $\pm$ 0.08  | < | 44.80    | $\pm$ 0.17                     |  |  | $4.5 \times 10^{-3}$  |
| Codon bias variance      | 0.46                  | $\pm$ 0.01  | > | 0.39     | $\pm$ 0.01                     |  |  | $2.2 \times 10^{-6}$  |
| gene length              | 1,570.30              | $\pm$ 24.41 | = | 1,561.71 | $\pm$ 36.20                    |  |  | not significant       |
| average intron length    | 124.44                | $\pm$ 3.23  | = | 152.49   | $\pm$ 9.14                     |  |  | not significant       |
| gene density (per 100kb) | 29.99                 | $\pm$ 0.12  | = | 29.48    | $\pm$ 0.30                     |  |  | not significant       |
